# Supplementary material for: The impact of accessible surface on hydrogen bond formation
Source: Royal Society of Chemistry journal article supplement (doi:10.1039/b926745j), 2010-01-01

## Supplementary Materials

**Figure S1:** Graph of steric accessibility surface fraction ( $F_{AS}$ ) against the average number of hydrogen bonds formed ( $\langle n_{HB} \rangle$ ) for six different donor functional groups in the CSD. Functional groups shown are as follows; amido (green triangles), aromatic amino (orange diamonds), hydroxy aliphatic (blue plus signs), hydroxy aromatic (red squares), secondary amino (purple circles) and generic (black crosses).

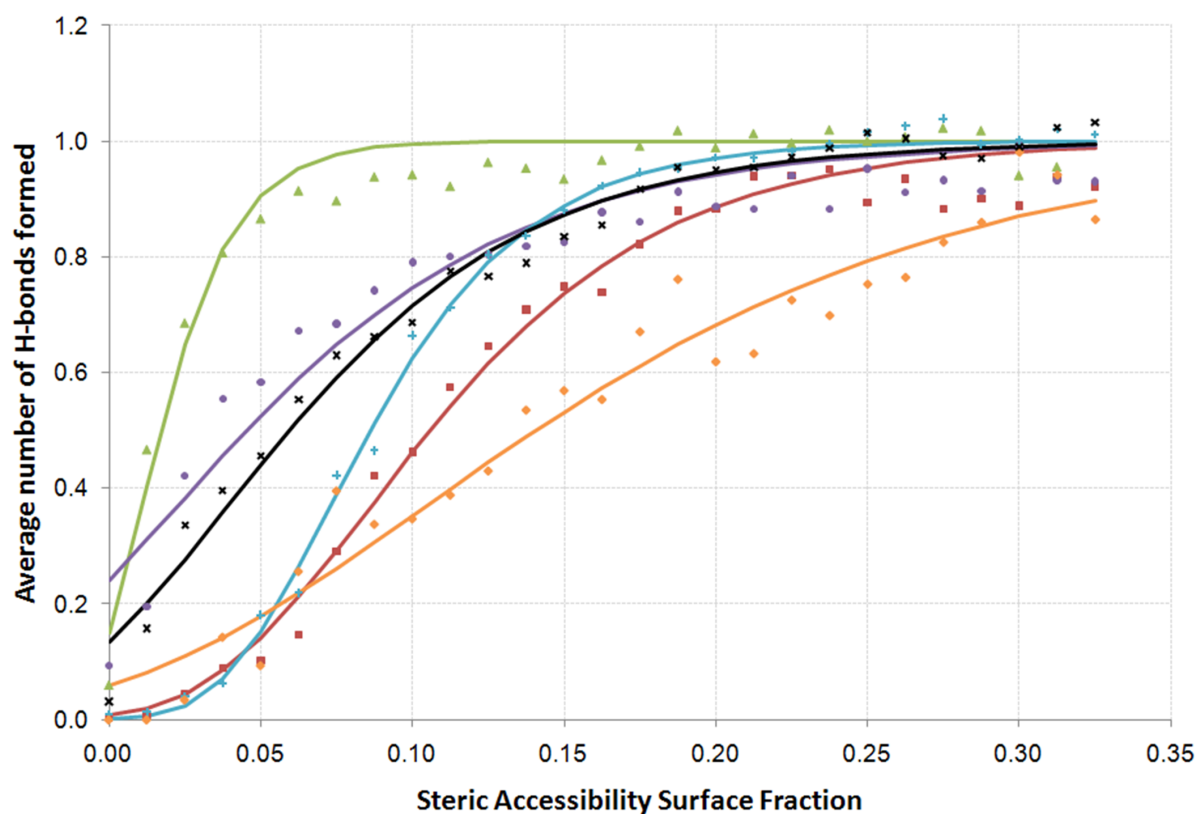

**Figure S2:** Graphs of steric accessibility surface fraction ( $F_{AS}$ ) against the average number of hydrogen bonds formed ( $\langle n_{HB} \rangle$ ) for nine different acceptor functional groups in the CSD. Functional groups are shown in two plots (on the same axes) for easier viewing. The functional groups are as follows; chlorine (orange filled circles), ketone (blue filled diamonds), phenol (green filled triangles), pyridyl (red filled squares) [graph *a*], ether (brown crosses), secondary amido (purple open triangles), secondary amino (cyan open diamonds), thioether (pink open squares) and generic (black plus signs) [graph *b*].

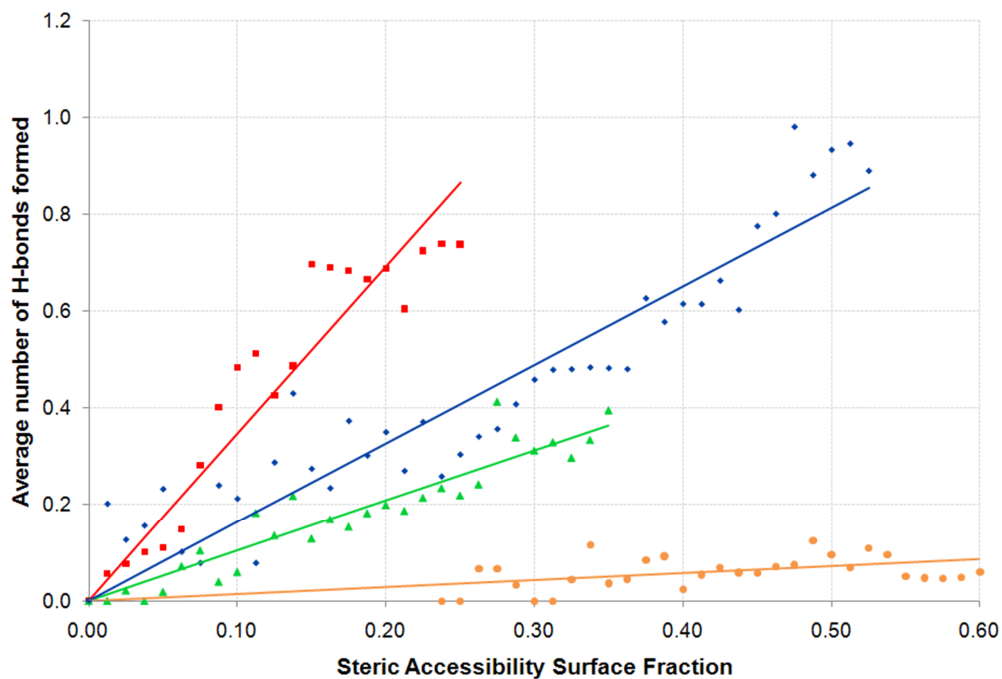

(a)

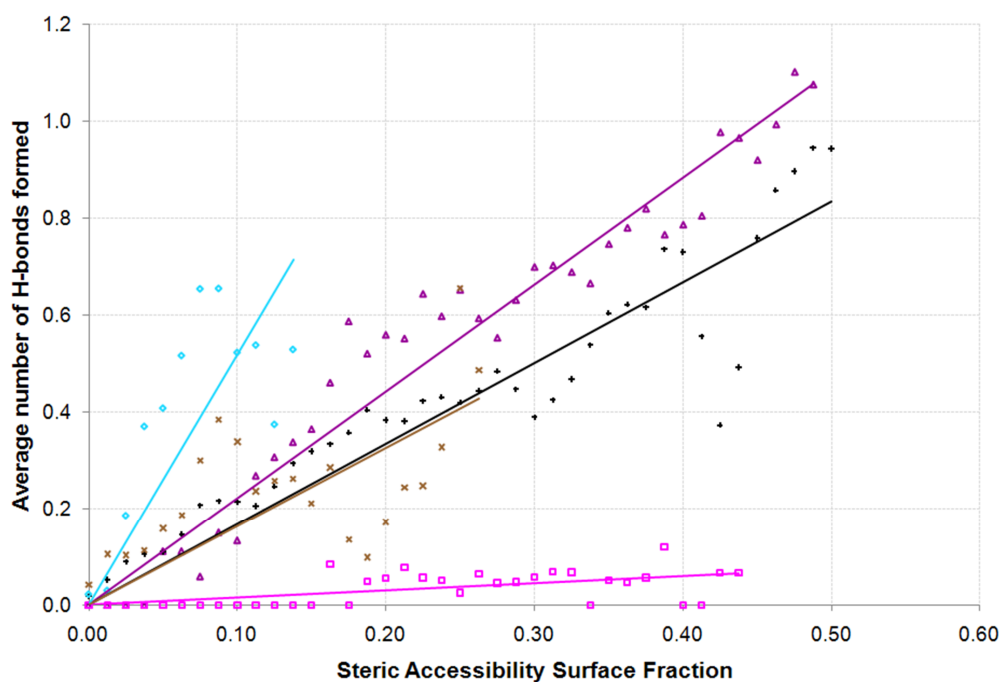

(b)

**Table S1:** Goodness-of-fit data for line-fitting in the plots of steric accessibility surface fraction ( $F_{AS}$ ) against the average number of hydrogen bonds formed ( $\langle n_{HB} \rangle$ ) for donor (left) and acceptor (right) groups as shown in Figs S1 & S2.

| <b>Donor Group</b>  | <b><math>R^2</math></b> |
|---------------------|-------------------------|
| Amido               | 0.964                   |
| Aromatic amino      | 0.952                   |
| Carbamoyl           | 0.975                   |
| Generic             | 0.984                   |
| Hydroxyl, aliphatic | 0.997                   |
| Phenol              | 0.988                   |
| Secondary amino     | 0.934                   |

| <b>Acceptor Group</b> | <b><math>R^2</math></b> |
|-----------------------|-------------------------|
| Chlorine              | 0.267                   |
| Ether                 | 0.183                   |
| Generic               | 0.859                   |
| Keto                  | 0.879                   |
| Phenol                | 0.893                   |
| Pyridyl               | 0.892                   |
| Secondary amido       | 0.947                   |
| Secondary amino       | 0.391                   |
| Thioether             | 0.349                   |

**Figure S3:** Diagrams of the substructure definitions used for specific donor (*a*) and acceptor (*b*) functional groups in the study. QA is defined as N or O; QC is classified as an acceptor by CCDC toolkit code, but not identified as one of the other eight common acceptors.

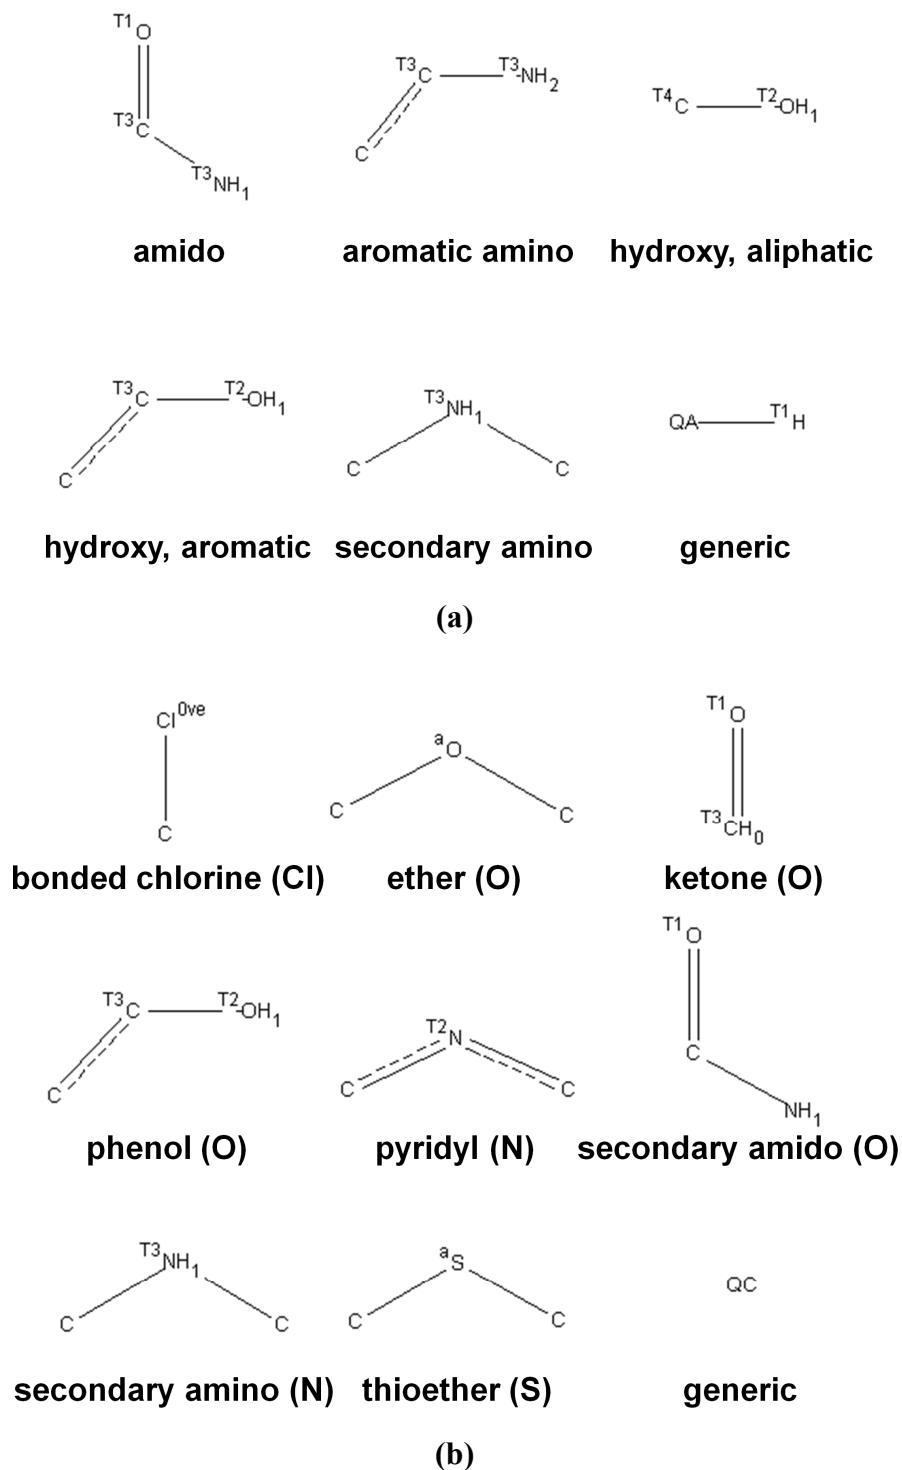

Supplement: b926745j.pdf [file b926745j.pdf]
